# Supplementary material for: Small molecules as cross-linkers: fabrication of carbon nanotubes/thionine self-assembled multilayers on amino functionalized surfaces
Source: Royal Society of Chemistry journal article supplement (doi:10.1039/b508130k), 2005-01-01
Supplement: b508130k.pdf [file b508130k.pdf]

### **Purification of multilwalled CNTs**

The CNTs were purified by refluxing in 3 M HNO<sub>3</sub> for 48 h, and then filtered with 2.5 μm pore size membrane with the aid of a pump and thoroughly washed with water to pH *ca.* 7, finally dried under vacuum at 60 °C overnight. The resulting CNTs were dispersed in dimethylformamide (DMF) at a concentration of 0.2 mg/ml with the aid of ultrasonic agitation. Before each deposition, the CNTs solution was further sonicated for 10 min.

### **Preparation procedure of the CNTs/thionine self-assembled multilayers**

Quartz slide was cleaned with “piranha solution”, a 3:7 solution mixture of 30% hydrogen peroxide (H<sub>2</sub>O<sub>2</sub>) and concentrated sulfuric acid (H<sub>2</sub>SO<sub>4</sub>) at 80 °C for 1 h (Caution: Since piranha solution reacts violently with many organic compounds, extreme care must be taken when handling it), followed by rinsing with water, and drying with a high purity nitrogen stream. ITO-coated glass was sonicated in acetone for 5 min, followed by rinsing with water, ultrasonic agitation in concentrated NaOH in 1:1 V/V water/ethanol, rinsing further with water, immersion in CHCl<sub>3</sub> for 10 min, and drying with high purity nitrogen stream.

Before assembly, the cleaned ITO glass or quartz slide was immersed in 4% (v:v) (3-aminopropyl)trimethoxysilane (APTMS) methanol solution for 1 day. After exhaustive rinsing by methanol, the APTMS-derivatized substrate was then immersed in 0.2 mg/ml CNT + DMF for 30 min resulting in the first layer of CNTs on the amino pre-modified surface using a known process [see reference 7]. After thoroughly rinsing with DMF and drying with a nitrogen stream, the CNTs-terminated substrate was transferred to 1.5 mM thionine + DMF for 30 min resulting in one layer of thionine. By alternate treatment with thionine solution and CNTs suspension until the desired number of bilayers was achieved, three-dimensional nano-architectures could be formed. The thickness and amounts of the multilayers were readily adjusted by choosing different number of cycles in the whole preparative process.

### The chemical structure of thionine molecule

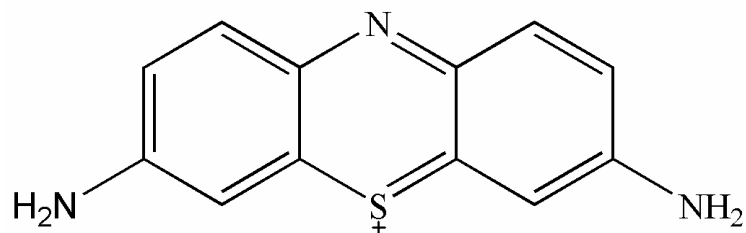

**Fig. S1** The chemical structure of thionine molecule.

### Raman Spectroscopy Characterization of the CNTs/thionine self-assembled multilayers

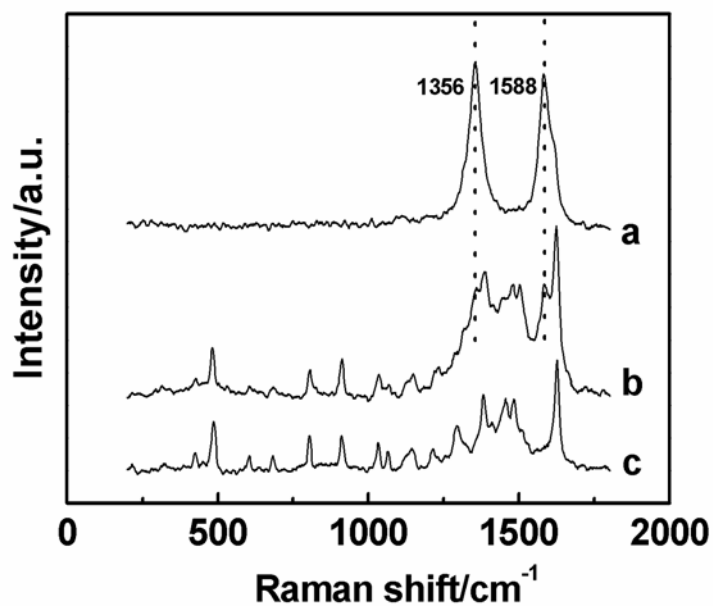

**Fig. S2** Raman spectra of (a) the bulk CNTs sample, (b) the (CNTs/thionine)<sub>14</sub> multilayer (thionine as the outmost layer), and (c) the bulk thionine sample.

**Electrocatalytic NADH oxidation on one layer CNTs modified films and  
(CNTs/thionine)<sub>1</sub> modified films**

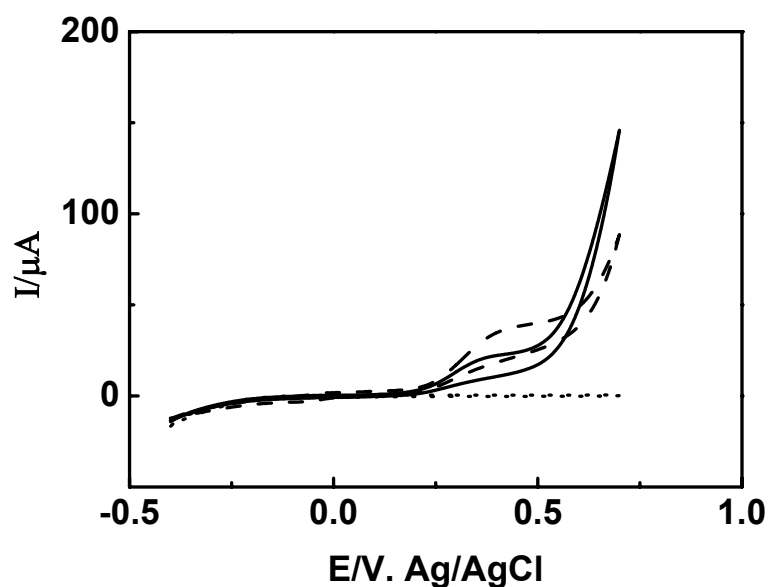

**Fig. S3** CVs of one layer CNTs modified film in absence (dotted line) and presence (solid line) of 0.5 mM NADH. The dashed line shows CV of (CNTs/thionine)<sub>1</sub> modified film in presence of 0.5 mM NADH. It clearly indicates that both thionine and carbon nanotube catalyze the NADH oxidation.
